# Supplementary material for: Reply to Kulić, Ž. Comment on “Subhadra et al. Significant Broad-Spectrum Antiviral Activity of Bi121 against Different Variants of SARS-CoV-2. Viruses 2023, 15, 1299”
Source: MDPI journal article supplement (doi:10.3390/v15112269), 2023-11-17
Supplement: s1 [file s1]

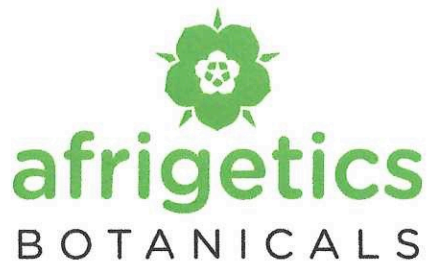

# PRO FORMA INVOICE

VAT No.: 4560247993

**Afrigetics C.C (T.A AFRIGETICS BOTANICALS TM)**  
381 Waterside Rd  
Wilderness  
George, Western Cape 6560  
South Africa

0448771696  
www.afrigetics.com

BILL TO  
**BULK SALES ENQUIRIES**

**Estimate Number:** Aug 0012

**P.O./S.O. Number:** DR Bobban

**Estimate Date:** August 28, 2018

**Expires On:** September 3, 2018

**Grand Total (USD):** \$528.50

| Product                                          | Quantity | Price    | Amount   |
|--------------------------------------------------|----------|----------|----------|
| <b>Aloe arborescens</b><br>pieces                | 5        | \$14.50  | \$72.50  |
| <b>Pelargonium sidoides Milled Powder 100ppm</b> | 2        | \$26.50  | \$53.00  |
| <b>Sceletium tortuosum Milled Powder</b>         | 2        | \$135.00 | \$270.00 |
| <b>Cites Permit</b>                              | 1        | \$60.00  | \$60.00  |
| <b>Courier Fees</b><br>via EMS                   | 1        | \$73.00  | \$73.00  |

**Total:** \$528.50

**Grand Total (USD):** \$528.50

## Notes

### BANK DETAILS:

Acc Name: Afrigetics cc

Bank: FNB

Branch: George ACC #: 62239920582

Bank Physical Address: 99 York Street, George, 6530.

SWIFT address: FIRNZAJJ

INVOICE DUE BEFORE SHIPPING.

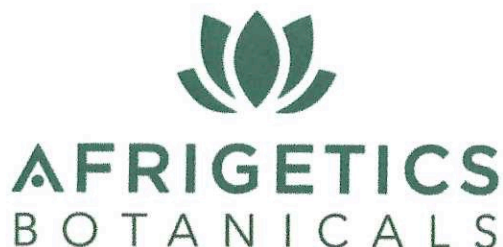

# PRO FORMA INVOICE

VAT No.: 4560247993

**Afrigetics CC (t/a Afrigetics Botanicals)**  
22 Waenhout Avenue  
Knysna Industrial  
Knysna, Western Cape 6570  
South Africa

+27 (0) 67 868 8488  
www.afrigetics.com

**BILL TO**  
**Biom Pharmaceuticals Corporation**  
Bobban Subhadra  
2203 Industrial Blvd,  
Saraosta, Florida 34234  
United States

505-220-4145  
bbobban@gmail.com

**Estimate Number:** BIOM012022

**Estimate Date:** January 27, 2022

**Expires On:** February 11, 2022

**Grand Total (USD):** \$3,020.00

| Product                                     | Quantity | Price      | Amount     |
|---------------------------------------------|----------|------------|------------|
| <b>Pelargonium sidoides Milled Powder</b>   | 100      | \$19.50    | \$1,950.00 |
| <b>Shipping and handling</b>                | 1        | \$1,070.00 | \$1,070.00 |
| Air freight to Florida, USA, CFR incoterms. |          |            |            |

**Total:** \$3,020.00

**Grand Total (USD):** \$3,020.00

## Notes / Terms

### BANK DETAILS:

South Africa:

Bank: First National Bank of South Africa (FNB)

Acc Name: Afrigetics CC

ACC No.: 62239920582 (Branch: George)

Global:

SWIFT address: FIRNZAJJ

FIRSTRAND BANK Ltd, Johannesburg

4 Merchant Place, Corner Fredman Drive and Rivonia

Acc Name: Afrigetics CC

ACC No.: 62239920582

PAYPAL PAYMENTS: bwfqueries@gmail.com

All business is conducted on prepayment unless otherwise agreed.

|                                                                                   |                                                                                       |               |                    |
|-----------------------------------------------------------------------------------|---------------------------------------------------------------------------------------|---------------|--------------------|
|  | <b>FSSC 22000 FOOD SAFETY MANAGEMENT SYSTEM</b>                                       |               |                    |
|                                                                                   | <b>CERTIFICATE OF ANALYSIS</b><br><b>PELARGONIUM SIDOIDES</b><br><b>MILLED POWDER</b> | Document No   | COARMPSMP          |
|                                                                                   |                                                                                       | Revision No   | 03                 |
|                                                                                   |                                                                                       | Revision Date | 25/11/2021         |
|                                                                                   |                                                                                       | Approved by   | QUALITY<br>MANAGER |

| RAW MATERIAL CERTIFICATE OF ANALYSIS |                                    |
|--------------------------------------|------------------------------------|
| PRODUCT NAME                         | PELARGONIUM SIDOIDES MILLED POWDER |
| BOTANICAL NAME                       | PELARGONIUM SIDOIDES               |
| FAMILY                               | GERANIACEAE                        |
| BATCH NUMBER                         | RMPSMP25052021KB                   |
| MANUFACTURING DATE                   | MAY 2021                           |
| EXPIRY DATE                          | APRIL 2024                         |

| PHYSICAL SPECIFICATION  |                                                                                                                                                                                                                                                         |
|-------------------------|---------------------------------------------------------------------------------------------------------------------------------------------------------------------------------------------------------------------------------------------------------|
| SENSORY CHARACTERISTICS | Astringent, bitter, woody taste with characteristic Pelargonium tuber smell.                                                                                                                                                                            |
| APPEARANCE              | Dark brown to reddish free -flowing powder                                                                                                                                                                                                              |
| TEXTURE                 | Powder                                                                                                                                                                                                                                                  |
| PLANT PART USED         | Tuber of the Pelargonium sidoides plant.                                                                                                                                                                                                                |
| COMPOSITION             | 100% Pelargonium sidoides dried tuber.                                                                                                                                                                                                                  |
| METHOD OF PRODUCTION    | 100% Pelargonium sidoides dried tuber, milled to a powder. Sterilized if required.                                                                                                                                                                      |
| IDENTIFICATION          | For milled powder:<br>Reduce to a Moderately fine powder. Not less than 95 % by mass passes through a number 355 sieve and not more than 40 % by mass passes through a number 180 sieve and not more than 6 % by mass passes through a number 63 sieve. |

| ANALYTICAL DATA                    |                   |              |
|------------------------------------|-------------------|--------------|
| PARAMETER                          | ACCEPTABLE LEVEL  | RESULTS      |
| CHEMICAL CHARACTERISTICS           |                   |              |
| Moisture                           | < 12 %            | Complies     |
| Loss on drying                     | < 12 %            | Complies     |
| ASSAY (Umckalin)                   | > 100 ppm         | Complies     |
| Total Ash                          | < 12 %            | 11.3%        |
| Ash insoluble in hydrochloric acid | < 3 %             | 1.74%        |
| Tannins (Expressed as pyrogallol)  | >2 %              | Complies     |
| MICROBIAL LIMITS                   |                   |              |
| Total Microbial Activity           | < 1 000 000 CFU/g | 56 500 CFU/g |



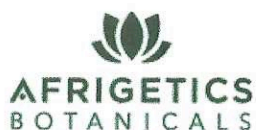

## FSSC 22000 FOOD SAFETY MANAGEMENT SYSTEM

### CERTIFICATE OF ANALYSIS PELARGONIUM SIDOIDES MILLED POWDER

|               |                    |
|---------------|--------------------|
| Document No   | COARMPSPMP         |
| Revision No   | 03                 |
| Revision Date | 25/11/2021         |
| Approved by   | QUALITY<br>MANAGER |

|                   |               |           |
|-------------------|---------------|-----------|
| Salmonella*       | Absent in 25g | Absent    |
| Escherichia coli* | Absent in 1g  | Absent    |
| Mould             | <10,000 CFU/g | 350 CFU/g |
| Yeast             | <10,000 CFU/g | 150 CFU/g |

\*For where the test result is < 10, it means that no colonies/microbial growth ("No growth") was observed at the lowest/ first dilution (1 in 10 dilution) of the sample. CFU = Colony-Forming Unit (A colony-forming unit is a unit used to estimate the number of viable bacteria or fungal cells in a sample. Viable is defined as the ability to multiply via binary fission under the controlled conditions.)

#### HEAVY METALS

|         |           |          |
|---------|-----------|----------|
| Lead    | < 5 ppm   | Complies |
| Cadmium | < 1 ppm   | Complies |
| Mercury | < 0.1 ppm | Complies |

#### AFLOTOXINS

Aflatoxins (B<sub>1</sub>) are not present.

#### PESTICIDE RESIDUE

No pesticide residue (Aldrin and Dieldrin) is present.

#### COUNTRY OF ORIGIN

Product of South Africa

#### STORAGE, TRANSPORTATION AND STABILITY

|                    |                                                                                                                                                                                                           |
|--------------------|-----------------------------------------------------------------------------------------------------------------------------------------------------------------------------------------------------------|
| STORAGE CONDITIONS | Stored on pallets, labelled, sealed, protected from moisture, light and high temperatures in a pest and rodent-proof area, stored away from harmful chemicals.                                            |
| TRANSPORTATION     | Enclosed vehicle, which is clean, dry, pest and chemical free. Vehicle should be suitable for the transportation of foodstuffs. Vehicle not to present any physical hazards e.g. glass and hard plastics. |
| SHELF LIFE         | 36 Months                                                                                                                                                                                                 |

#### BULK PACKAGING

|            |                                                                        |
|------------|------------------------------------------------------------------------|
| MATERIAL   | DESCRIPTION                                                            |
| Packaging  | In double polyethylene bags placed inside double PVC tamper proof bag. |
| Net Weight | 20 kg                                                                  |

**FOOD SAFETY RELATED ACCEPTANCE CRITERIA OR SPECIFICATIONS OF PURCHASED MATERIALS AND INGREDIENTS APPROPRIATE FOR THEIR INTENDED USE**

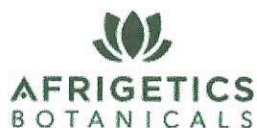

# FSSC 22000 FOOD SAFETY MANAGEMENT SYSTEM

## CERTIFICATE OF ANALYSIS PELARGONIUM SIDOIDES MILLED POWDER

|               |                    |
|---------------|--------------------|
| Document No   | COARMPSMP          |
| Revision No   | 03                 |
| Revision Date | 25/11/2021         |
| Approved by   | QUALITY<br>MANAGER |

To be used as an ingredient in the preparation of herbal medicine or food supplements.

### STATUTORY AND REGULATORY FOOD SAFETY REQUIREMENTS

No additional requirements.

### POTENTIAL ABUSE OF PRODUCT

Storing in direct sunlight, unprotected from moisture and high temperatures. Not tightly closing after opening.

### ALLERGEN STATEMENT

The above-mentioned product is made of allergen-free ingredients. This product does not contain allergens subject to labelling according to regulation (EU) No. 1169/2011 and amendments. Process controls are in place to ensure that no accidental contamination with allergenic material could occur.

### GMO STATEMENT

This product has not been in contact with any GMO, therefore the regulations (EC) 1829/2003 and (EC) 1830/2003 are not applicable.

### TSE/BSE STATEMENT

In the production process of this product, we do not use any raw material of animal origin. This product has not been in contact with and does not include any material of animal origin. Our product is not contaminated with material of animal origin when it leaves our storage facility.

### KOSHER/HALAAL STATUS

Halaal Certified.

### COMPILED BY

|                 |                 |           |                  |
|-----------------|-----------------|-----------|------------------|
| QUALITY MANAGER | INUS SCHOONRAAD | SIGNATURE | DATE: 25/11/2021 |
| MANAGER         | STEVEN HURT     | SIGNATURE | DATE: 25/11/2021 |
